# Supplementary material
Source: PubMed Central journal article supplement (PMC10756927)
Supplement: NIHMS1905546-supplement-1.pdf [file NIHMS1905546-supplement-1.pdf]

| <b>Dementia</b> | <b>UTI</b> | <b>Falls</b> | <b>Delirium</b> |
|-----------------|------------|--------------|-----------------|
| F01.50          | N10        | Z91.81       | R41.0           |
| F01.51          | N11.9      | R29.6        | F10.231         |
| F02.80          | N12        | W01          | F12.921         |
| F02.81          | N15.1      | W03          | F18.921         |
| F03.90          | N15.9      | W04          | F11.921         |
| F03.91          | N16        | W05          | F16.921         |
| F04             | N28.84     | W06          | F15.921         |
| G13.8           | N28.85     | W07          | F10.921         |
| F05             | N28.86     | W08          | F13.921         |
| F06.1           | N30.00     | W10          | F19.221         |
| F06.8           | N30.01     | W11          | F10.121         |
| G30.0           | N30.90     | W12          |                 |
| G30.1           | N30.91     | W17          |                 |
| G30.8           | N39.0      | W18          |                 |
| G30.9           |            | W19          |                 |
| G31.1           |            |              |                 |
| G31.2           |            |              |                 |
| G31.01          |            |              |                 |
| G31.09          |            |              |                 |
| G94             |            |              |                 |
| R41.81          |            |              |                 |
| R54             |            |              |                 |

**Supplemental Table 1.** Diagnosis code groups for geriatric syndrome conditions of interest

|                                  | <b>Matched non-GED<br/>(n=152)</b> | <b>GED<br/>(n=38)</b> |
|----------------------------------|------------------------------------|-----------------------|
| LOS Median (hours, median [IQR]) |                                    |                       |
| 45-64                            | 3.9 [2.4-6.0]                      | 3.5 [ 2.1-5.5]        |
| 65-74                            | 4.3 [2.8-6.5]                      | 4.0 [2.5-6.1]         |
| 75-84                            | 4.5 [3.0-6.7]                      | 4.2 [2.7-6.4]         |
| 85+                              | 4.7 [3.2-7.0]                      | 4.5 [2.9-6.7]         |
| 72-hour ED Revisit (%)           |                                    |                       |
| 45-64                            | 4.1%                               | 3.6%                  |
| 65-74                            | 3.5%                               | 2.8%                  |
| 75-84                            | 3.1%                               | 2.6%                  |
| 85+                              | 2.9%                               | 2.3%                  |
| Discharge Disposition (%)        |                                    |                       |
| 45-64                            | 81.5%                              | 78.7%                 |
| 65-74                            | 72.6%                              | 66.6%                 |
| 75-84                            | 67.8%                              | 59.3%                 |
| 85+                              | 63.3%                              | 52.4%                 |

**Supplemental Table 2.** Emergency department process outcome measures (pooled visit-level analysis)

Note – Process outcome measures were assessed in a pooled visit-level analysis.

Abbreviations: GED – geriatric emergency department; LOS – length of stay

|                                          | <b>GEDs<br/>(n=38)</b> | <b>GEDs not in CEDR<sup>a</sup><br/>(n=118)</b> |
|------------------------------------------|------------------------|-------------------------------------------------|
| <i>U.S. Census Region</i>                |                        |                                                 |
| Northeast                                | 12 (31.6%)             | 42 (35.6%)                                      |
| Midwest                                  | 8 (21.1%)              | 32 (27.1%)                                      |
| South                                    | 7 (18.4%)              | 21 (17.8%)                                      |
| West                                     | 11 (28.9%)             | 23 (19.5%)                                      |
| <i>CBSA</i>                              |                        |                                                 |
| Metro                                    | 37 (97.4%)             | 113 (95.8%)                                     |
| Micro                                    | 1 (2.6%)               | 3 (2.5%)                                        |
| Rural                                    | 0 (0%)                 | 1 (0.8%)                                        |
| Critical Access                          | 2 (5.3%)               | 2 (1.7%)                                        |
| AHA Teaching Status                      | 36 (94.7%)             | 96 (81.4%)                                      |
| Free Standing Status                     | 16 (42.1%)             | 63 (53.4%)                                      |
| <i>ED Visit volume, 2021<sup>b</sup></i> |                        |                                                 |
| <20k                                     | 12 (31.6%)             | 28 (23.7%)                                      |
| 20-40k                                   | 12 (31.6%)             | 41 (34.7%)                                      |
| 40-60k                                   | 9 (23.7%)              | 16 (13.6%)                                      |
| 60-80k                                   | 4 (10.5%)              | 13 (11.0%)                                      |
| 80k+                                     | 1 (2.6%)               | 20 (16.9%)                                      |
| Female (% , median [IQR])                | 54.8% [51.6%-56.6%]    | N/A                                             |
| <i>Visits Age 65+ (% , median [IQR])</i> |                        |                                                 |
| 65-74                                    | 11.3% [10.4%-12.7%]    | N/A                                             |
| 75-84                                    | 8.1% [6.9%-9.9%]       | N/A                                             |
| 85+                                      | 4.6% [3.8%-5.9%]       | N/A                                             |

**Supplemental Table 3.** Geriatric emergency department characteristics

Abbreviations: AHA – American Hospital Association; CBSA – Core-based statistical area; GED – geriatric emergency department; CEDR – Clinical Emergency Data Registry

<sup>a</sup> We present characteristics of GEDs not included within CEDR to allow comparison of generalizability of our results to the broader number of GEDs nationally. Of note, we included 118 GED sites not within CEDR that were accredited by the end of 2020 and had linkable AHA data. There were an additional 24 GEDs not within CEDR accredited by the end of 2020 that were not positively linked to an AHA site.

<sup>b</sup> We used CEDR data to identify ED visit volumes for GEDs and relied on AHA data for the GEDs not included in CEDR.
